# Supplementary material for: Evaluation of electrochemical processes for the removal of several target aromatic hydrocarbons from petroleum contaminated water
Source: Royal Society of Chemistry journal article supplement (doi:10.1039/c0em00450b), 2011-01-01
Supplement: c0em00450b.pdf [file c0em00450b.pdf]

*Electronic Supplementary Information*

## Evaluation of electrochemical processes for the removal of several target aromatic hydrocarbons from petroleum contaminated water

Yamen AlSalka,\*<sup>a</sup> François Karabet <sup>a</sup>, and Shahir Hashem <sup>a</sup>

<sup>a</sup> Department of Chemistry, Faculty of Sciences, University of Damascus, Damascus, Syria.  
Fax: +96311 44684141; Tel: +96393 3306459; E-mail: yamensalka@yahoo.com

**Table 1/S** Time table of the gradient elution used in the HPLC separation

| Time (min) | Solvent A % (Water) | Solvent B % (Acetonitrile) | Flow rate (mL min <sup>-1</sup> ) |
|------------|---------------------|----------------------------|-----------------------------------|
| 0.00       | 50.00               | 50.00                      | 1.0                               |
| 5.00       | 50.00               | 50.00                      | 1.0                               |
| 30.00      | 1.00                | 99.00                      | 1.0                               |
| 52.00      | 1.00                | 99.00                      | 1.0                               |
| 55.00      | 50.00               | 50.00                      | 1.0                               |
| 60.00      | 50.00               | 50.00                      | 1.0                               |

**Table 2/S** HPLC detection parameters used in diode array and fluorescence detectors

| Diode array detector |                 |                | Fluorescence detector |                 |               |
|----------------------|-----------------|----------------|-----------------------|-----------------|---------------|
| Signal               | Wavelength (nm) | Bandwidth (nm) | Time (min)            | Excitation (nm) | Emission (nm) |
| A                    | 245             | 8              | 0.00                  | 256             | 390           |
|                      |                 |                | 22.50                 | 275             | 420           |
|                      |                 |                | 32.00                 | 270             | 385           |
|                      |                 |                | 38.00                 | 290             | 430           |
|                      |                 |                | 55.00                 | 305             | 480           |
| Spectrum scan(nm)    | From 190 to 450 |                | 60.00                 | 256             | 390           |

**Table 5/S** ANOVA results of the CCD experiments /Response: Removal/

| Source of variation         | Degrees of freedom | Sum of squares (Partial) | Mean squares (Partial) | F ratio  | P value <sup>a</sup> |
|-----------------------------|--------------------|--------------------------|------------------------|----------|----------------------|
| Model                       | 14                 | 5841.275                 | 417.2339               | 381.2436 | 2.34E-36             |
| A:Current Density           | 1                  | 3585.016                 | 3585.0156              | 3275.775 | 1.74E-38             |
| B:Electrolyte Concentration | 1                  | 821.6822                 | 821.6822               | 750.8045 | 1.24E-26             |
| C:Electrolysis Time         | 1                  | 425.0469                 | 425.0469               | 388.3827 | 1.51E-21             |
| D:pH                        | 1                  | 99.7668                  | 99.7668                | 91.161   | 1.22E-11             |
| AB                          | 1                  | 5.4781                   | 5.4781                 | 5.0055   | 0.0312               |
| AC                          | 1                  | 21.2878                  | 21.2878                | 19.4515  | 8.21E-05             |
| AD                          | 1                  | 0.0378                   | 0.0378                 | 0.0346   | 0.8535               |
| BC                          | 1                  | 44.8404                  | 44.8404                | 40.9725  | 1.61E-07             |
| BD                          | 1                  | 1.805                    | 1.805                  | 1.6493   | 0.2068               |
| CD                          | 1                  | 5.0721                   | 5.0721                 | 4.6346   | 0.0377               |
| AA                          | 1                  | 89.5049                  | 89.5049                | 81.7843  | 5.17E-11             |
| BB                          | 1                  | 4.7378                   | 4.7378                 | 4.3292   | 0.0443               |
| CC                          | 1                  | 4.8975                   | 4.8975                 | 4.475    | 0.041                |
| DD                          | 1                  | 134.3376                 | 134.3376               | 122.7497 | 1.83E-13             |
| Residual                    | 38                 | 41.5873                  | 1.0944                 |          |                      |
| Lack of Fit                 | 10                 | 40.3611                  | 4.0361                 | 92.1675  | 1.03E-18             |
| Pure Error                  | 28                 | 1.2262                   | 0.0438                 |          |                      |
| Total                       | 52                 | 5882.862                 |                        |          |                      |

<sup>a</sup> Alpha= 0.05, S= 1.0461, R-sq = 99.69%, R-sq(adj) = 99.43%, PRESS= 77.1552

*Electronic Supplementary Information*

**Table 3/S** Factor levels used in the FFD and the total BTEX & PAHs removal percentage

| Standard order | Run Order | A: ED <sup>a</sup> (mA cm <sup>-2</sup> ) | B: EC <sup>b</sup> (g L <sup>-1</sup> ) | C: ET <sup>c</sup> (min) | pH | Removal (%) |
|----------------|-----------|-------------------------------------------|-----------------------------------------|--------------------------|----|-------------|
| 4              | 1         | 20                                        | 0.5                                     | 100                      | 5  | 37.05       |
| 125            | 2         | 25                                        | 1                                       | 120                      | 8  | 91.77       |
| 15             | 3         | 20                                        | 1                                       | 100                      | 10 | 52.65       |
| 147            | 4         | 30                                        | 1                                       | 80                       | 10 | 73.15       |
| 116            | 5         | 25                                        | 0.5                                     | 120                      | 8  | 82.97       |
| 59             | 6         | 30                                        | 0.5                                     | 100                      | 8  | 86.95       |
| 8              | 7         | 20                                        | 0.5                                     | 120                      | 8  | 58.96       |
| 124            | 8         | 25                                        | 1                                       | 120                      | 5  | 66.76       |
| 49             | 9         | 25                                        | 2                                       | 100                      | 5  | 68.05       |
| 99             | 10        | 20                                        | 1                                       | 120                      | 10 | 64.32       |
| 87             | 11        | 20                                        | 0.5                                     | 100                      | 10 | 43.45       |
| 3              | 12        | 20                                        | 0.5                                     | 80                       | 10 | 36.46       |
| 81             | 13        | 30                                        | 2                                       | 120                      | 10 | 91.89       |
| 23             | 14        | 20                                        | 2                                       | 100                      | 8  | 78.01       |
| 60             | 15        | 30                                        | 0.5                                     | 100                      | 10 | 77.03       |
| 50             | 16        | 25                                        | 2                                       | 100                      | 8  | 89.81       |
| 5              | 17        | 20                                        | 0.5                                     | 100                      | 8  | 49.7        |
| 159            | 18        | 30                                        | 2                                       | 100                      | 10 | 88.23       |
| 134            | 19        | 25                                        | 2                                       | 120                      | 8  | 100         |
| 48             | 20        | 25                                        | 2                                       | 80                       | 10 | 69.47       |
| 132            | 21        | 25                                        | 2                                       | 100                      | 10 | 80.52       |
| 10             | 22        | 20                                        | 1                                       | 80                       | 5  | 36.44       |
| 149            | 23        | 30                                        | 1                                       | 100                      | 8  | 93.1        |
| 44             | 24        | 25                                        | 1                                       | 120                      | 8  | 91.91       |
| 7              | 25        | 20                                        | 0.5                                     | 120                      | 5  | 42.96       |
| 14             | 26        | 20                                        | 1                                       | 100                      | 8  | 60.72       |
| 91             | 27        | 20                                        | 1                                       | 80                       | 5  | 36.42       |
| 151            | 28        | 30                                        | 1                                       | 120                      | 5  | 74.62       |
| 143            | 29        | 30                                        | 0.5                                     | 120                      | 8  | 95.66       |
| 17             | 30        | 20                                        | 1                                       | 120                      | 8  | 74.02       |
| 56             | 31        | 30                                        | 0.5                                     | 80                       | 8  | 74.76       |
| 38             | 32        | 25                                        | 1                                       | 80                       | 8  | 68.27       |
| 108            | 33        | 20                                        | 2                                       | 120                      | 10 | 81.93       |
| 162            | 34        | 30                                        | 2                                       | 120                      | 10 | 91.65       |
| 72             | 35        | 30                                        | 1                                       | 120                      | 10 | 88.61       |
| 122            | 36        | 25                                        | 1                                       | 100                      | 8  | 81.18       |
| 71             | 37        | 30                                        | 1                                       | 120                      | 8  | 100         |
| 107            | 38        | 20                                        | 2                                       | 120                      | 8  | 91.96       |
| 63             | 39        | 30                                        | 0.5                                     | 120                      | 10 | 84.93       |
| 29             | 40        | 25                                        | 0.5                                     | 80                       | 8  | 57.13       |
| 13             | 41        | 20                                        | 1                                       | 100                      | 5  | 43.89       |
| 65             | 42        | 30                                        | 1                                       | 80                       | 8  | 83.51       |
| 35             | 43        | 25                                        | 0.5                                     | 120                      | 8  | 82.9        |
| 2              | 44        | 20                                        | 0.5                                     | 80                       | 8  | 41.64       |
| 114            | 45        | 25                                        | 0.5                                     | 100                      | 10 | 60.14       |
| 156            | 46        | 30                                        | 2                                       | 80                       | 10 | 85.19       |
| 97             | 47        | 20                                        | 1                                       | 120                      | 5  | 54.26       |
| 100            | 48        | 20                                        | 2                                       | 80                       | 5  | 42.18       |
| 52             | 49        | 25                                        | 2                                       | 120                      | 5  | 72.42       |
| 20             | 50        | 20                                        | 2                                       | 80                       | 8  | 65.76       |
| 88             | 51        | 20                                        | 0.5                                     | 120                      | 5  | 42.75       |
| 22             | 52        | 20                                        | 2                                       | 100                      | 5  | 56.68       |
| 139            | 53        | 30                                        | 0.5                                     | 100                      | 5  | 63.75       |
| 36             | 54        | 25                                        | 0.5                                     | 120                      | 10 | 72.56       |
| 53             | 55        | 25                                        | 2                                       | 120                      | 8  | 100         |
| 79             | 56        | 30                                        | 2                                       | 120                      | 5  | 78.2        |
| 40             | 57        | 25                                        | 1                                       | 100                      | 5  | 58.4        |
| 66             | 58        | 30                                        | 1                                       | 80                       | 10 | 72.89       |
| 158            | 59        | 30                                        | 2                                       | 100                      | 8  | 100         |
| 153            | 60        | 30                                        | 1                                       | 120                      | 10 | 88.52       |
| 115            | 61        | 25                                        | 0.5                                     | 120                      | 5  | 60.25       |
| 46             | 62        | 25                                        | 2                                       | 80                       | 5  | 57.49       |
| 106            | 63        | 20                                        | 2                                       | 120                      | 5  | 67.83       |
| 126            | 64        | 25                                        | 1                                       | 120                      | 10 | 81.08       |
| 136            | 65        | 30                                        | 0.5                                     | 80                       | 5  | 54.14       |
| 103            | 66        | 20                                        | 2                                       | 100                      | 5  | 56.33       |
| 129            | 67        | 25                                        | 2                                       | 80                       | 10 | 69.17       |
| 83             | 68        | 20                                        | 0.5                                     | 80                       | 8  | 41.3        |
| 157            | 69        | 30                                        | 2                                       | 100                      | 5  | 76.21       |
| 138            | 70        | 30                                        | 0.5                                     | 80                       | 10 | 65.6        |
| 101            | 71        | 20                                        | 2                                       | 80                       | 8  | 65.47       |
| 145            | 72        | 30                                        | 1                                       | 80                       | 5  | 60          |
| 9              | 73        | 20                                        | 0.5                                     | 120                      | 10 | 51.75       |

*Electronic Supplementary Information*

|     |     |    |     |     |    |       |
|-----|-----|----|-----|-----|----|-------|
| 64  | 74  | 30 | 1   | 80  | 5  | 59.77 |
| 69  | 75  | 30 | 1   | 100 | 10 | 83.76 |
| 131 | 76  | 25 | 2   | 100 | 8  | 89.9  |
| 146 | 77  | 30 | 1   | 80  | 8  | 83.29 |
| 150 | 78  | 30 | 1   | 100 | 10 | 83.53 |
| 93  | 79  | 20 | 1   | 80  | 10 | 44.56 |
| 154 | 80  | 30 | 2   | 80  | 5  | 71.2  |
| 31  | 81  | 25 | 0.5 | 100 | 5  | 47.73 |
| 54  | 82  | 25 | 2   | 120 | 10 | 86    |
| 152 | 83  | 30 | 1   | 120 | 8  | 100   |
| 96  | 84  | 20 | 1   | 100 | 10 | 52.9  |
| 24  | 85  | 20 | 2   | 100 | 10 | 68.15 |
| 128 | 86  | 25 | 2   | 80  | 8  | 80.48 |
| 112 | 87  | 25 | 0.5 | 100 | 5  | 47.92 |
| 18  | 88  | 20 | 1   | 120 | 10 | 64.5  |
| 27  | 89  | 20 | 2   | 120 | 10 | 81.79 |
| 62  | 90  | 30 | 0.5 | 120 | 8  | 95.86 |
| 41  | 91  | 25 | 1   | 100 | 8  | 80.97 |
| 25  | 92  | 20 | 2   | 120 | 5  | 67.49 |
| 32  | 93  | 25 | 0.5 | 100 | 8  | 67.96 |
| 43  | 94  | 25 | 1   | 120 | 5  | 66.43 |
| 47  | 95  | 25 | 2   | 80  | 8  | 80.2  |
| 89  | 96  | 20 | 0.5 | 120 | 8  | 58.6  |
| 144 | 97  | 30 | 0.5 | 120 | 10 | 84.94 |
| 28  | 98  | 25 | 0.5 | 80  | 5  | 41.77 |
| 95  | 99  | 20 | 1   | 100 | 8  | 60.64 |
| 74  | 100 | 30 | 2   | 80  | 8  | 97.28 |
| 39  | 101 | 25 | 1   | 80  | 10 | 59.81 |
| 26  | 102 | 20 | 2   | 120 | 8  | 92.08 |
| 76  | 103 | 30 | 2   | 100 | 5  | 75.98 |
| 92  | 104 | 20 | 1   | 80  | 8  | 51.04 |
| 85  | 105 | 20 | 0.5 | 100 | 5  | 37.32 |
| 61  | 106 | 30 | 0.5 | 120 | 5  | 69.61 |
| 104 | 107 | 20 | 2   | 100 | 8  | 78.34 |
| 78  | 108 | 30 | 2   | 100 | 10 | 88.57 |
| 102 | 109 | 20 | 2   | 80  | 10 | 59.11 |
| 21  | 110 | 20 | 2   | 80  | 10 | 58.8  |
| 34  | 111 | 25 | 0.5 | 120 | 5  | 60.51 |
| 55  | 112 | 30 | 0.5 | 80  | 5  | 54.11 |
| 73  | 113 | 30 | 2   | 80  | 5  | 71.06 |
| 113 | 114 | 25 | 0.5 | 100 | 8  | 67.63 |
| 119 | 115 | 25 | 1   | 80  | 8  | 68.04 |
| 86  | 116 | 20 | 0.5 | 100 | 8  | 50.05 |
| 133 | 117 | 25 | 2   | 120 | 5  | 72.29 |
| 130 | 118 | 25 | 2   | 100 | 5  | 68.35 |
| 30  | 119 | 25 | 0.5 | 80  | 10 | 49.92 |
| 118 | 120 | 25 | 1   | 80  | 5  | 50.29 |
| 148 | 121 | 30 | 1   | 100 | 5  | 69.63 |
| 105 | 122 | 20 | 2   | 100 | 10 | 67.82 |
| 45  | 123 | 25 | 1   | 120 | 10 | 80.95 |
| 98  | 124 | 20 | 1   | 120 | 8  | 74.32 |
| 33  | 125 | 25 | 0.5 | 100 | 10 | 59.95 |
| 109 | 126 | 25 | 0.5 | 80  | 5  | 41.51 |
| 16  | 127 | 20 | 1   | 120 | 5  | 54.52 |
| 57  | 128 | 30 | 0.5 | 80  | 10 | 65.79 |
| 121 | 129 | 25 | 1   | 100 | 5  | 58.14 |
| 68  | 130 | 30 | 1   | 100 | 8  | 92.82 |
| 90  | 131 | 20 | 0.5 | 120 | 10 | 52    |
| 123 | 132 | 25 | 1   | 100 | 10 | 71.43 |
| 42  | 133 | 25 | 1   | 100 | 10 | 71.68 |
| 117 | 134 | 25 | 0.5 | 120 | 10 | 71.99 |
| 70  | 135 | 30 | 1   | 120 | 5  | 74.44 |
| 127 | 136 | 25 | 2   | 80  | 5  | 57.21 |
| 160 | 137 | 30 | 2   | 120 | 5  | 77.97 |
| 82  | 138 | 20 | 0.5 | 80  | 5  | 30.18 |
| 37  | 139 | 25 | 1   | 80  | 5  | 49.9  |
| 140 | 140 | 30 | 0.5 | 100 | 8  | 87.69 |
| 137 | 141 | 30 | 0.5 | 80  | 8  | 74.83 |
| 120 | 142 | 25 | 1   | 80  | 10 | 60.01 |
| 51  | 143 | 25 | 2   | 100 | 10 | 80.66 |
| 75  | 144 | 30 | 2   | 80  | 10 | 84.98 |
| 141 | 145 | 30 | 0.5 | 100 | 10 | 77.01 |
| 94  | 146 | 20 | 1   | 100 | 5  | 44.08 |
| 111 | 147 | 25 | 0.5 | 80  | 10 | 49.64 |
| 135 | 148 | 25 | 2   | 120 | 10 | 86.21 |
| 77  | 149 | 30 | 2   | 100 | 8  | 100   |

Electronic Supplementary Information

|     |     |    |     |     |    |       |
|-----|-----|----|-----|-----|----|-------|
| 1   | 150 | 20 | 0.5 | 80  | 5  | 30.37 |
| 6   | 151 | 20 | 0.5 | 100 | 10 | 43.88 |
| 12  | 152 | 20 | 1   | 80  | 10 | 44.63 |
| 155 | 153 | 30 | 2   | 80  | 8  | 97.13 |
| 142 | 154 | 30 | 0.5 | 120 | 5  | 69.97 |
| 110 | 155 | 25 | 0.5 | 80  | 8  | 57.27 |
| 19  | 156 | 20 | 2   | 80  | 5  | 41.36 |
| 161 | 157 | 30 | 2   | 120 | 8  | 100   |
| 58  | 158 | 30 | 0.5 | 100 | 5  | 63.69 |
| 67  | 159 | 30 | 1   | 100 | 5  | 69.84 |
| 84  | 160 | 20 | 0.5 | 80  | 10 | 36.19 |
| 11  | 161 | 20 | 1   | 80  | 8  | 50.77 |
| 80  | 162 | 30 | 2   | 120 | 8  | 100   |

<sup>a</sup> CD: Current density, <sup>b</sup> EC: NaCl concentration, <sup>c</sup> ET: Electrolysis time.

Table 6/S ANOVA results of the CCD experiments /Response: Energy consumption/

| Source of variation         | Degrees of freedom | Sum of squares (Partial) | Mean squares (Partial) | F ratio  | P value <sup>a</sup> |
|-----------------------------|--------------------|--------------------------|------------------------|----------|----------------------|
| Model                       | 14                 | 9.42E+04                 | 6726.8346              | 248.9297 | 7.01E-33             |
| A:Current Density           | 1                  | 7642.548                 | 7642.5478              | 282.8161 | 3.41E-19             |
| B:Electrolyte Concentration | 1                  | 5.59E+04                 | 5.59E+04               | 2068.429 | 9.58E-35             |
| C:Electrolysis Time         | 1                  | 365.0647                 | 365.0647               | 13.5094  | 0.0007               |
| D:pH                        | 1                  | 1.72E+04                 | 1.72E+04               | 636.0856 | 2.46E-25             |
| AB                          | 1                  | 1877.772                 | 1877.7724              | 69.4879  | 4.15E-10             |
| AC                          | 1                  | 104.2929                 | 104.2929               | 3.8594   | 0.0568               |
| AD                          | 1                  | 731.8182                 | 731.8182               | 27.0813  | 7.01E-06             |
| BC                          | 1                  | 22.9673                  | 22.9673                | 0.8499   | 0.3624               |
| BD                          | 1                  | 4376.971                 | 4376.9707              | 161.9719 | 2.82E-15             |
| CD                          | 1                  | 13.4292                  | 13.4292                | 0.497    | 0.4851               |
| AA                          | 1                  | 60.9662                  | 60.9662                | 2.2561   | 0.1414               |
| BB                          | 1                  | 765.7345                 | 765.7345               | 28.3364  | 4.82E-06             |
| CC                          | 1                  | 45.9278                  | 45.9278                | 1.6996   | 0.2002               |
| DD                          | 1                  | 860.3364                 | 860.3364               | 31.8372  | 1.76E-06             |
| Residual                    | 38                 | 1026.875                 | 27.023                 |          |                      |
| Lack of Fit                 | 10                 | 1025.979                 | 102.5979               | 3205.934 | 4.53E-40             |
| Pure Error                  | 28                 | 0.8961                   | 0.032                  |          |                      |
| Total                       | 52                 | 9.52E+04                 |                        |          |                      |

<sup>a</sup> Alpha= 0.05, S= 4.1984, R-sq = 99.22%, R-sq(adj) = 99.02%, PRESS=1255.403

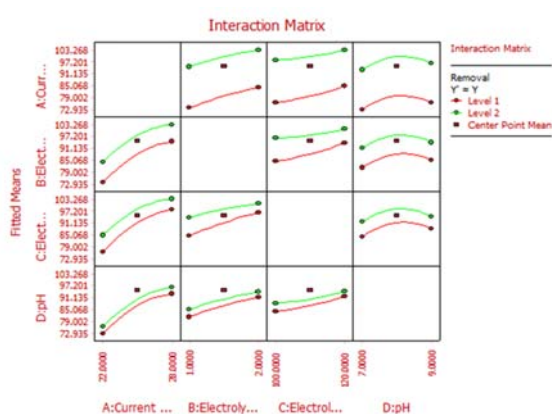

Fig.1/S Interaction matrix for removal efficiency in CCD design

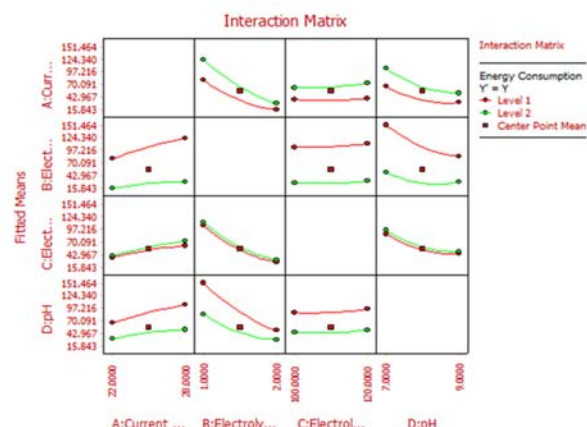

Fig.2/S Interaction matrix for energy consumption in CCD design

*Electronic Supplementary Information*

**Table 4/S A** 2<sup>4</sup> design plus central point used in CCD

| Standard Order | Run Order | Point Type | A: ED <sup>a</sup><br>(mA cm <sup>-2</sup> ) | B: EC <sup>b</sup><br>(g L <sup>-1</sup> ) | C: ET <sup>c</sup><br>(min) | pH | Removal (%) | Energy Consumption<br>(Kwh g <sup>-1</sup> x 10 <sup>3</sup> ) |
|----------------|-----------|------------|----------------------------------------------|--------------------------------------------|-----------------------------|----|-------------|----------------------------------------------------------------|
| 53             | 1         | 0          | 25                                           | 1.5                                        | 110                         | 8  | 95          | 55.3                                                           |
| 3              | 2         | 1          | 22                                           | 2                                          | 100                         | 7  | 75.33       | 35.59                                                          |
| 52             | 3         | 0          | 25                                           | 1.5                                        | 110                         | 8  | 94.85       | 55.39                                                          |
| 37             | 4         | 1          | 22                                           | 1                                          | 120                         | 9  | 76.88       | 69.61                                                          |
| 33             | 5         | 1          | 22                                           | 1                                          | 100                         | 9  | 66.31       | 67.39                                                          |
| 41             | 6         | -1         | 22                                           | 1.5                                        | 110                         | 8  | 78.89       | 43.45                                                          |
| 1              | 7         | 1          | 22                                           | 1                                          | 100                         | 7  | 63.09       | 120.4                                                          |
| 26             | 8         | 1          | 28                                           | 1                                          | 100                         | 7  | 84.72       | 174.53                                                         |
| 47             | 9         | -1         | 25                                           | 1.5                                        | 110                         | 7  | 86.02       | 84.46                                                          |
| 21             | 10        | -1         | 25                                           | 1.5                                        | 100                         | 8  | 89.79       | 53.39                                                          |
| 31             | 11        | 1          | 22                                           | 2                                          | 120                         | 7  | 81.32       | 39.48                                                          |
| 30             | 12        | 1          | 28                                           | 1                                          | 120                         | 7  | 92.69       | 191.05                                                         |
| 39             | 13        | 1          | 22                                           | 2                                          | 120                         | 9  | 83.9        | 22.96                                                          |
| 18             | 14        | -1         | 28                                           | 1.5                                        | 110                         | 8  | 100         | 54.84                                                          |
| 14             | 15        | 1          | 28                                           | 1                                          | 120                         | 9  | 95.57       | 106.9                                                          |
| 4              | 16        | 1          | 28                                           | 2                                          | 100                         | 7  | 95.21       | 54.95                                                          |
| 28             | 17        | 1          | 28                                           | 2                                          | 100                         | 7  | 94.99       | 55.08                                                          |
| 7              | 18        | 1          | 22                                           | 2                                          | 120                         | 7  | 81.53       | 39.38                                                          |
| 40             | 19        | 1          | 28                                           | 2                                          | 120                         | 9  | 100         | 35.42                                                          |
| 11             | 20        | 1          | 22                                           | 2                                          | 100                         | 9  | 78.58       | 20.47                                                          |
| 50             | 21        | 0          | 25                                           | 1.5                                        | 110                         | 8  | 94.69       | 55.48                                                          |
| 35             | 22        | 1          | 22                                           | 2                                          | 100                         | 9  | 78.49       | 20.49                                                          |
| 19             | 23        | -1         | 25                                           | 1                                          | 110                         | 8  | 86.16       | 94.71                                                          |
| 17             | 24        | -1         | 22                                           | 1.5                                        | 110                         | 8  | 78.64       | 43.59                                                          |
| 45             | 25        | -1         | 25                                           | 1.5                                        | 100                         | 8  | 89.52       | 53.56                                                          |
| 12             | 26        | 1          | 28                                           | 2                                          | 100                         | 9  | 100         | 29.57                                                          |
| 13             | 27        | 1          | 22                                           | 1                                          | 120                         | 9  | 77.06       | 69.44                                                          |
| 20             | 28        | -1         | 25                                           | 2                                          | 110                         | 8  | 99.11       | 34.96                                                          |
| 24             | 29        | -1         | 25                                           | 1.5                                        | 110                         | 9  | 90.85       | 46.75                                                          |
| 38             | 30        | 1          | 28                                           | 1                                          | 120                         | 9  | 95.74       | 106.71                                                         |
| 8              | 31        | 1          | 28                                           | 2                                          | 120                         | 7  | 100         | 62.66                                                          |
| 16             | 32        | 1          | 28                                           | 2                                          | 120                         | 9  | 100         | 35.42                                                          |
| 2              | 33        | 1          | 28                                           | 1                                          | 100                         | 7  | 84.45       | 175.09                                                         |
| 29             | 34        | 1          | 22                                           | 1                                          | 120                         | 7  | 73.28       | 124.14                                                         |
| 43             | 35        | -1         | 25                                           | 1                                          | 110                         | 8  | 86.2        | 94.66                                                          |
| 34             | 36        | 1          | 28                                           | 1                                          | 100                         | 9  | 89.11       | 95.73                                                          |
| 15             | 37        | 1          | 22                                           | 2                                          | 120                         | 9  | 84.14       | 22.9                                                           |
| 27             | 38        | 1          | 22                                           | 2                                          | 100                         | 7  | 75.14       | 35.68                                                          |
| 25             | 39        | 1          | 22                                           | 1                                          | 100                         | 7  | 62.88       | 120.81                                                         |
| 42             | 40        | -1         | 28                                           | 1.5                                        | 110                         | 8  | 100         | 54.84                                                          |
| 5              | 41        | 1          | 22                                           | 1                                          | 120                         | 7  | 73          | 124.62                                                         |
| 44             | 42        | -1         | 25                                           | 2                                          | 110                         | 8  | 98.92       | 35.03                                                          |
| 10             | 43        | 1          | 28                                           | 1                                          | 100                         | 9  | 88.93       | 95.92                                                          |
| 48             | 44        | -1         | 25                                           | 1.5                                        | 110                         | 9  | 90.61       | 46.88                                                          |
| 32             | 45        | 1          | 28                                           | 2                                          | 120                         | 7  | 100         | 62.66                                                          |
| 23             | 46        | -1         | 25                                           | 1.5                                        | 110                         | 7  | 86.29       | 84.2                                                           |
| 49             | 47        | 0          | 25                                           | 1.5                                        | 110                         | 8  | 94.74       | 55.45                                                          |
| 6              | 48        | 1          | 28                                           | 1                                          | 120                         | 7  | 92.45       | 191.54                                                         |
| 51             | 49        | 0          | 25                                           | 1.5                                        | 110                         | 8  | 95.07       | 55.26                                                          |
| 46             | 50        | -1         | 25                                           | 1.5                                        | 120                         | 8  | 98.83       | 58.1                                                           |
| 36             | 51        | 1          | 28                                           | 2                                          | 100                         | 9  | 100         | 29.57                                                          |
| 9              | 52        | 1          | 22                                           | 1                                          | 100                         | 9  | 66.15       | 67.55                                                          |
| 22             | 53        | -1         | 25                                           | 1.5                                        | 120                         | 8  | 100         | 57.42                                                          |

<sup>a</sup> CD: Current density, <sup>b</sup> EC: NaCl concentration, <sup>c</sup> ET: Electrolysis time.

Electronic Supplementary Information

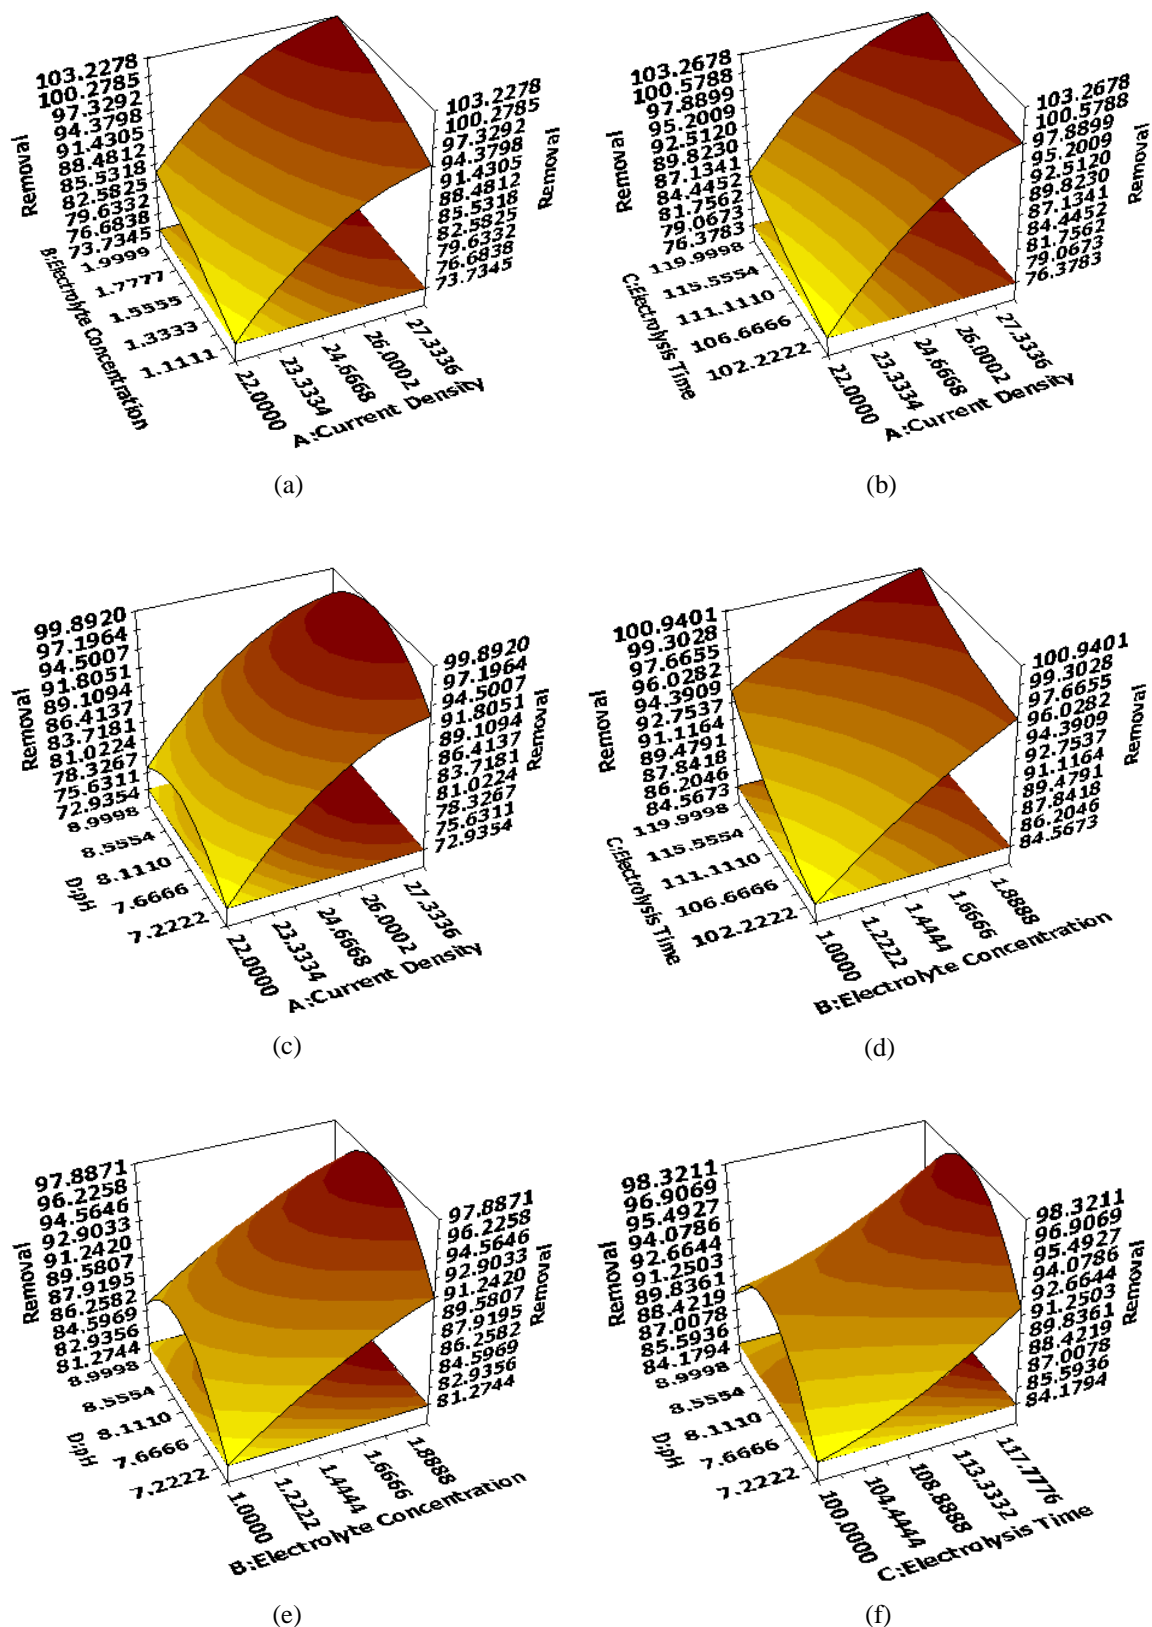

Fig.3/S Response surface plot resulted from CCD /removal efficiency/, (a) current density vs. electrolyte concentration, (b) current density vs. electrolysis time, (c) current density vs. pH, (d) electrolyte concentration vs. electrolysis time, (e) electrolyte concentration vs. pH, (f) electrolysis time vs. pH

Electronic Supplementary Information

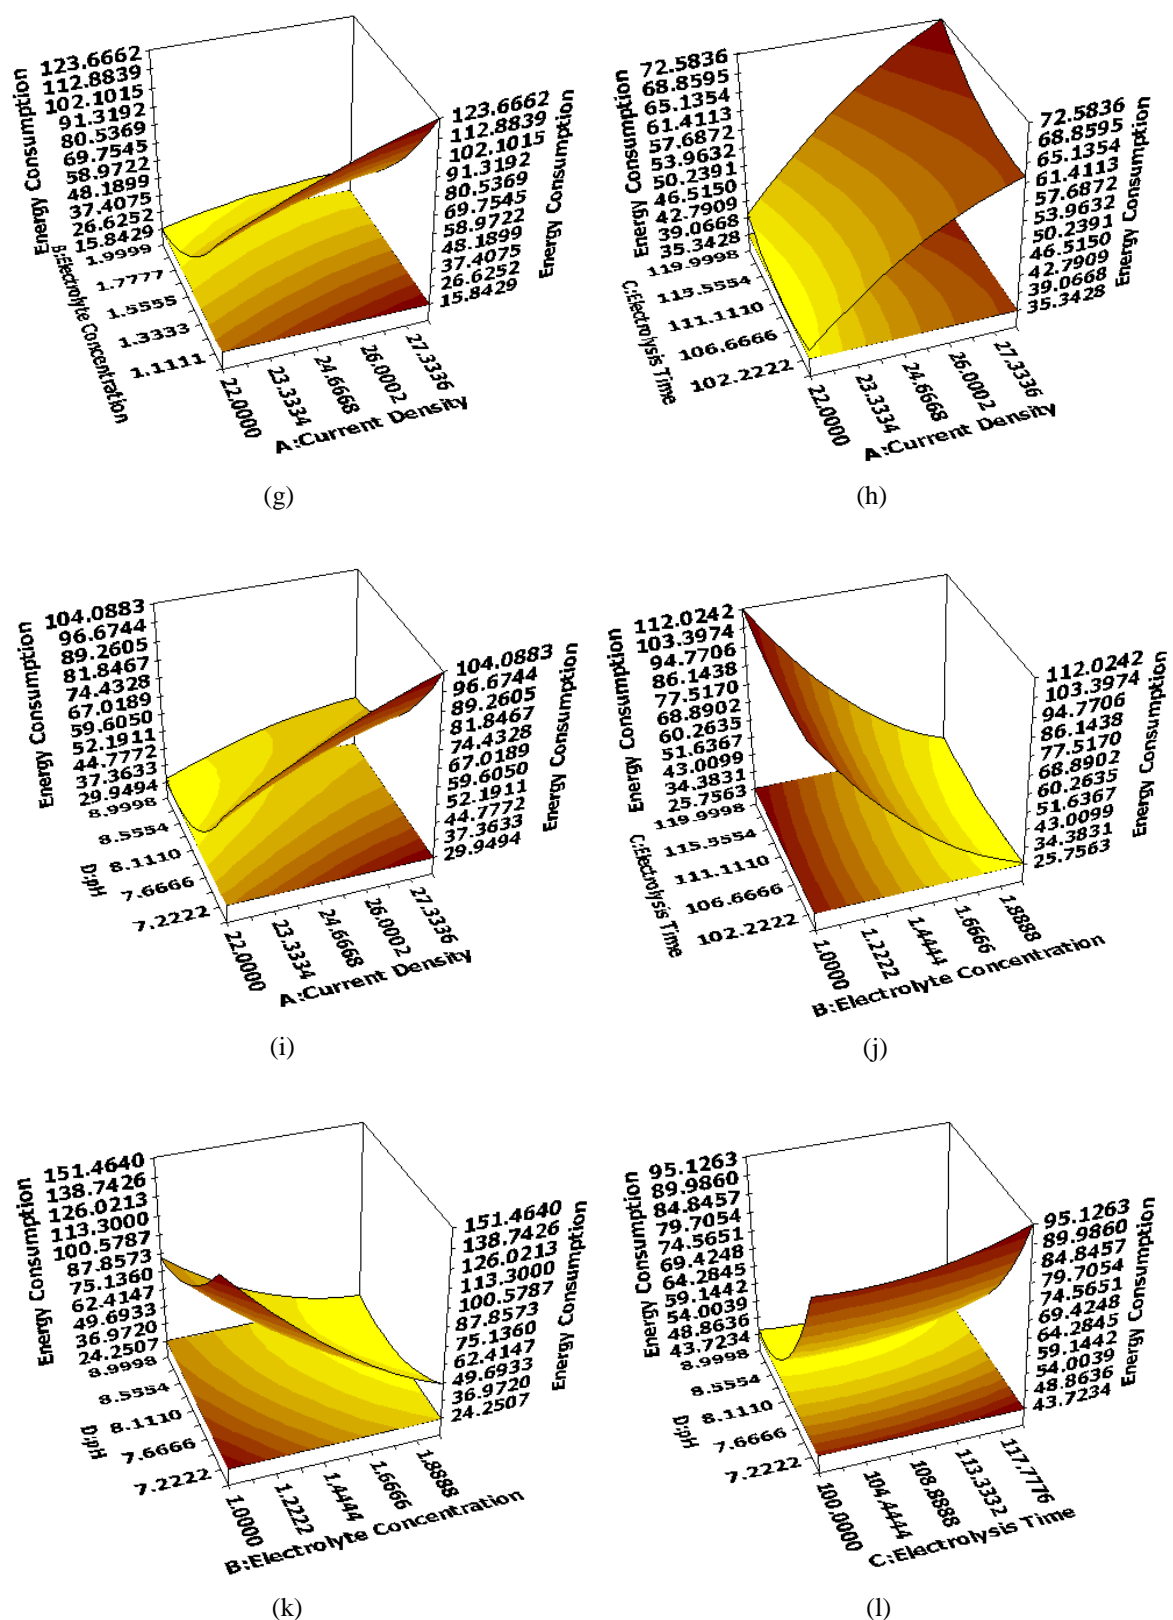

Fig.4/S Response surface plot resulted from CCD /energy consumption/, (g) current density vs. electrolyte concentration, (h) current density vs. electrolysis time, (i) current density vs. pH, (j) electrolyte concentration vs. electrolysis time, (k) electrolyte concentration vs. pH, (l) electrolysis time vs. pH
